# Supplementary material for: Vanadium(IV)-Chlorodipicolinate Protects against Hepatic Steatosis by Ameliorating Lipid Peroxidation, Endoplasmic Reticulum Stress, and Inflammation
Source: MDPI journal article supplement (doi:10.3390/antiox11061093), 2022-05-31
Supplement: s1 [file s1]

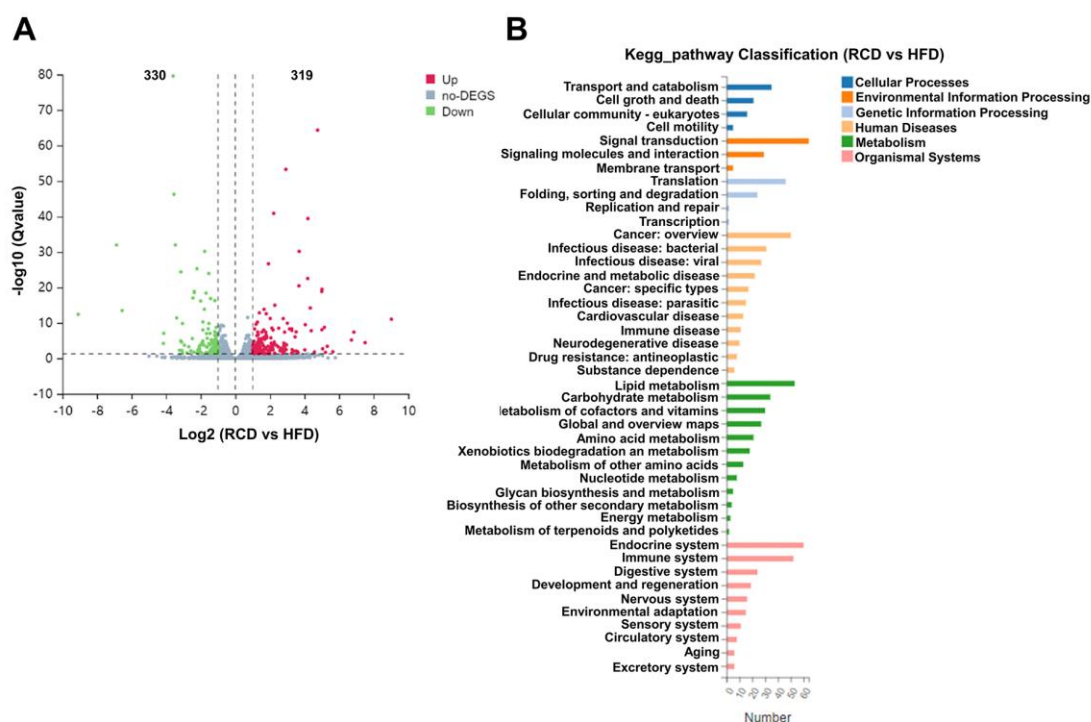

**Figure S1: Analysis of differentially expressed genes between RCD group and HFD group.** (A) Volcano plot shows the fold change of DEGs of RCD vs HFD group. (B) KEGG pathway classification of DEGs from RCD vs HFD group.

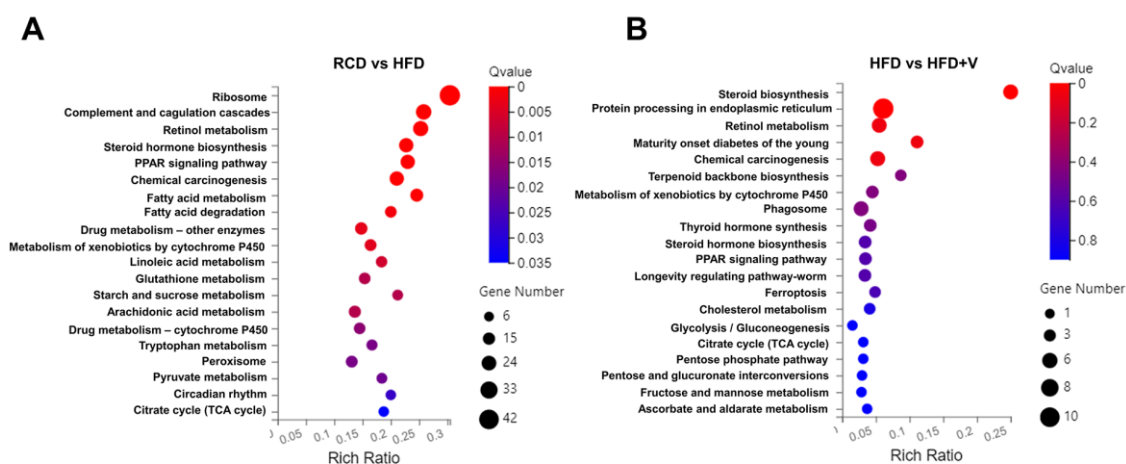

**Figure S2. Analysis of KEGG pathways.** The advanced bubble chart shows the top 20 enriched KEGG pathways of the DEGs in the RCD vs HFD group (A), and HFD vs HFD+V group (B).

**Table S1.** The quantitative real-time PCR primer information.

| Gene name | Forward primer (5'-3') | Reverse primer (5'-3') |
|-----------|------------------------|------------------------|
| Ppary     | CGCTGATGCACTGCCTATGA   | AGAGGTCCACAGAGCTGATTCC |
| Srebp-1c  | GGCAGGCTTTGAAGACGAA    | CACGACAAGGACTGAGGGAC   |

|        |                         |                         |
|--------|-------------------------|-------------------------|
| Cebp/a | AACGCAACAACATCGCGGT     | GCGGTCATTGTCACTGGTCAA   |
| Fas    | AGTTTCATGAACCCGCCTC     | GCAGACATGCTGTGGATCTG    |
| Ppara  | GTGGGTGGTTGAATCGTGAG    | GCAGTGGAGTTTGGGTGG      |
| Atg1   | TGGATGGCGGCATTTCAAGACA  | TGACGCGAAGCTCGTGGATGTT  |
| Hsl    | GGAGAGAGTCTGCAGGAACG    | CCTGCAAGAGTATGTCACGC    |
| Cpt1   | AGTGGCCTCACAGACTCCAG    | GCCCATGTTGTACAGCTTCC    |
| Ucp2   | TCCTGCTACCTCCCAGAAGA    | TGAGACCTCAAAGCAGCCTC    |
| Atf4   | ATGGCGCTCTTCACGAAATC    | ACTGGTCGAAGGGGTCATCAA   |
| Atf6   | GACTCACCCATCCGAGTTGTG   | CTCCAGTCTTCATCTGGTCC    |
| Xbp1   | AGCAGCAAGTGGTGGATTG     | GAGTTTTCTCCCGTAAAAGCTGA |
| Ire1   | ACACCGACCACCGTATCTCA    | CTCAGGATAATGGTAGCCATGTC |
| Traf3  | CAGCCTAACCCACCCCTAAAG   | TCTTCCACCGTCTTCACAAAC   |
| Chop   | CTGGAAGCCTGGTATGAGGAT   | CAGGGTCAAGAGTAGTGAAGGT  |
| Grp78  | ACTTGGGGACCACCTATTCT    | ATCGCCAATCAGACGCTCC     |
| Cxcl10 | CCAAGTGCTGCCGTCATTTTC   | GGCTCGCAGGGATGATTCAA    |
| Ccr1   | CTCATGCAGCATAGGAGGCTT   | ACATGGCATCACCAAAAATCCA  |
| Ccl12  | ATTTCCACACTTCTATGCCTCCT | ATCCAGTATGGTCCTGAAGATCA |
| Ifng   | ATGAACGCTACACACTGCATC   | CCATCCTTTTGCCAGTTCCTC   |
| Myd88  | AGGACAAACGCCGGAACTTTT   | GCCGATAGTCTGTCTGTTCTAGT |
| Hspa1a | TGGTGCAGTCCGACATGAAG    | GCTGAGAGTCGTTGAAGTAGGC  |
| Il1β   | GCAACTGTTCTGAACTCAACT   | ATCTTTTGGGGTCCGTCAACT   |
| Ccl2   | TCTTCCTGCTCACATTACCAT   | CACAGCATGAACAATAGCCAA   |
| Cd206  | TTGGACGGATAGATGGAGGG    | CCAGGCAGTTGAGGAGGTTT    |
| actin  | GGCTGTATTCCCCTCCATCG    | CCAGTTGGTAACAATGCCATGT  |

---

**Table S2.** Detail information for antibodies.

| <b>Targeted protein</b> | <b>Cat. no.</b> | <b>Source</b> | <b>Provider</b>                  |
|-------------------------|-----------------|---------------|----------------------------------|
| FAS                     | 3189            | rabbit        | Cell Signaling Technology        |
| PPAR $\gamma$           | 2435S           | rabbit        | Cell Signaling Technology        |
| ATF4                    | 11815S          | rabbit        | Cell Signaling Technology        |
| eIF2a                   | 5324            | rabbit        | Cell Signaling Technology        |
| p-eIF2a                 | 9721S           | rabbit        | Cell Signaling Technology        |
| IL-1 $\beta$            | 12242S          | rabbit        | Cell Signaling Technology        |
| P-P65                   | 3033S           | rabbit        | Cell Signaling Technology        |
| ATGL                    | sc-365278       | mouse         | Santa Cruz Biotechnology         |
| CPT1                    | sc-393070       | mouse         | Santa Cruz Biotechnology         |
| CHOP                    | sc-7351         | mouse         | Santa Cruz Biotechnology         |
| GRP78                   | sc-166490       | mouse         | Santa Cruz Biotechnology         |
| IKB-a                   | sc-371          | Rabbit        | Santa Cruz Biotechnology         |
| P-IKB-a                 | sc-8404         | mouse         | Santa Cruz Biotechnology         |
| CEBP/a                  | ab40764         | rabbit        | Abcam PLC                        |
| SREBP-1c                | #P02A751L       | mouse         | Jinpulai Biotechnology Co., Ltd. |
| HSL                     | ab45422         | rabbit        | Abcam PLC                        |
| P65                     | 32705           | rabbit        | Signalway antibody               |
